# Supplementary material for: Sensitivity of Detecting Alpha-Synuclein Accumulation in the Gastrointestinal Tract and Tissue Volume Examined
Source: PubMed Central journal article supplement — J Mov Disord. 2022 Jul 26;15(3):264–8. doi: 10.14802/jmd.22042 (PMC9536904; doi:10.14802/jmd.22042), 2022-07-26
Supplement: jmd-22042-suppl.pdf [file jmd-22042-suppl.pdf]

**Supplementary Table 1.** Detailed pAS immunostaining results with semi-quantitative grades of extensive tissue (5 slides per block)

| Group   | ID  | Distal block |          |          |          |          | Proximal block |           |            |            |            |            |            |
|---------|-----|--------------|----------|----------|----------|----------|----------------|-----------|------------|------------|------------|------------|------------|
|         |     | Extensive    | Distal 1 | Distal 2 | Distal 3 | Distal 4 | Distal 5       | Extensive | Proximal 1 | Proximal 2 | Proximal 3 | Proximal 4 | Proximal 5 |
| Patient | P01 | (+)          | 3+       | 3+       | 2+       | 2+       | 1+             | (+)       | 3+         | 3+         | 3+         | 3+         | 3+         |
| Patient | P02 | (+)          | 0        | 0        | 0        | 1+       | 0              | (+)       | 1+         | 1+         | 1+         | 1+         | 0          |
| Patient | P03 | (+)          | 3+       | 2+       | 3+       | 3+       | 3+             | (+)       | 2+         | 2+         | 1+         | 2+         | 2+         |
| Patient | P04 | (+)          | 2+       | 2+       | 3+       | 3+       | 2+             | (+)       | 3+         | 3+         | 2+         | 3+         | 2+         |
| Patient | P05 | (+)          | 1+       | 2+       | 2+       | 2+       | 2+             | (+)       | 3+         | 3+         | 3+         | 3+         | 3+         |
| Patient | P06 | (+)          | 1+       | 1+       | 1+       | 1+       | 1+             | (-)       | 0          | 0          | 0          | 0          | 0          |
| Patient | P07 | (+)          | 3+       | 3+       | 3+       | 3+       | 3+             | (+)       | 3+         | 3+         | 3+         | 3+         | 3+         |
| Patient | P08 | (-)          | 0        | 0        | 0        | 0        | 0              | (+)       | 1+         | 1+         | 1+         | 1+         | 1+         |
| Patient | P09 | (-)          | 0        | 0        | 0        | 0        | 0              | (-)       | 0          | 0          | 0          | 0          | 0          |
| Control | C01 | (-)          | 0        | 0        | 0        | 0        | 0              | (-)       | 0          | 0          | 0          | 0          | 0          |
| Control | C02 | (-)          | 0        | 0        | 0        | 0        | 0              | (+)       | 1+         | 0          | 1+         | 0          | 0          |
| Control | C03 | (-)          | 0        | 0        | 0        | 0        | 0              | (-)       | 0          | 0          | 0          | 0          | 0          |
| Control | C04 | (-)          | 0        | 0        | 0        | 0        | 0              | (-)       | 0          | 0          | 0          | 0          | 0          |
| Control | C05 | (-)          | 0        | 0        | 0        | 0        | 0              | (-)       | 0          | 0          | 0          | 0          | 0          |

pAS, phosphorylated alpha-synuclein.
